# Supplementary material
Source: PubMed Central journal article supplement (PMC3098452)
Supplement: NIHMS282356-supplement-Supplementary_Data.pdf [file NIHMS282356-supplement-Supplementary_Data.pdf]

# **Efficacy of Weekly Docetaxel and Bevacizumab in Mesenchymal Chondrosarcoma: a New Theranostic Method Combining Xenografted Biopsies with a Mathematical Model**

Gorelik B.<sup>1</sup>, Ziv I.<sup>1</sup>, Shohat R.<sup>1</sup>, Wick M.<sup>2</sup>, Hankins D.<sup>4,5</sup>, Sidransky D.<sup>5,\*</sup>, Agur Z.<sup>1,6,\*</sup>

<sup>1</sup>Optimata Ltd., Ramat-Gan 52522, Israel; <sup>2</sup>CTRC Institute for Drug Development, San Antonio, TX, USA;; <sup>4</sup>New Hope Pharmaceuticals Inc., Bethesda, MD, USA; <sup>5</sup>John Hopkins University School of Medicine, Baltimore, MD, USA; <sup>6</sup>Institute for Medical BioMathematics (IMBM), Bene Ataroth, Israel.  
\*Co-Senior Author.

## **Supplementary material**

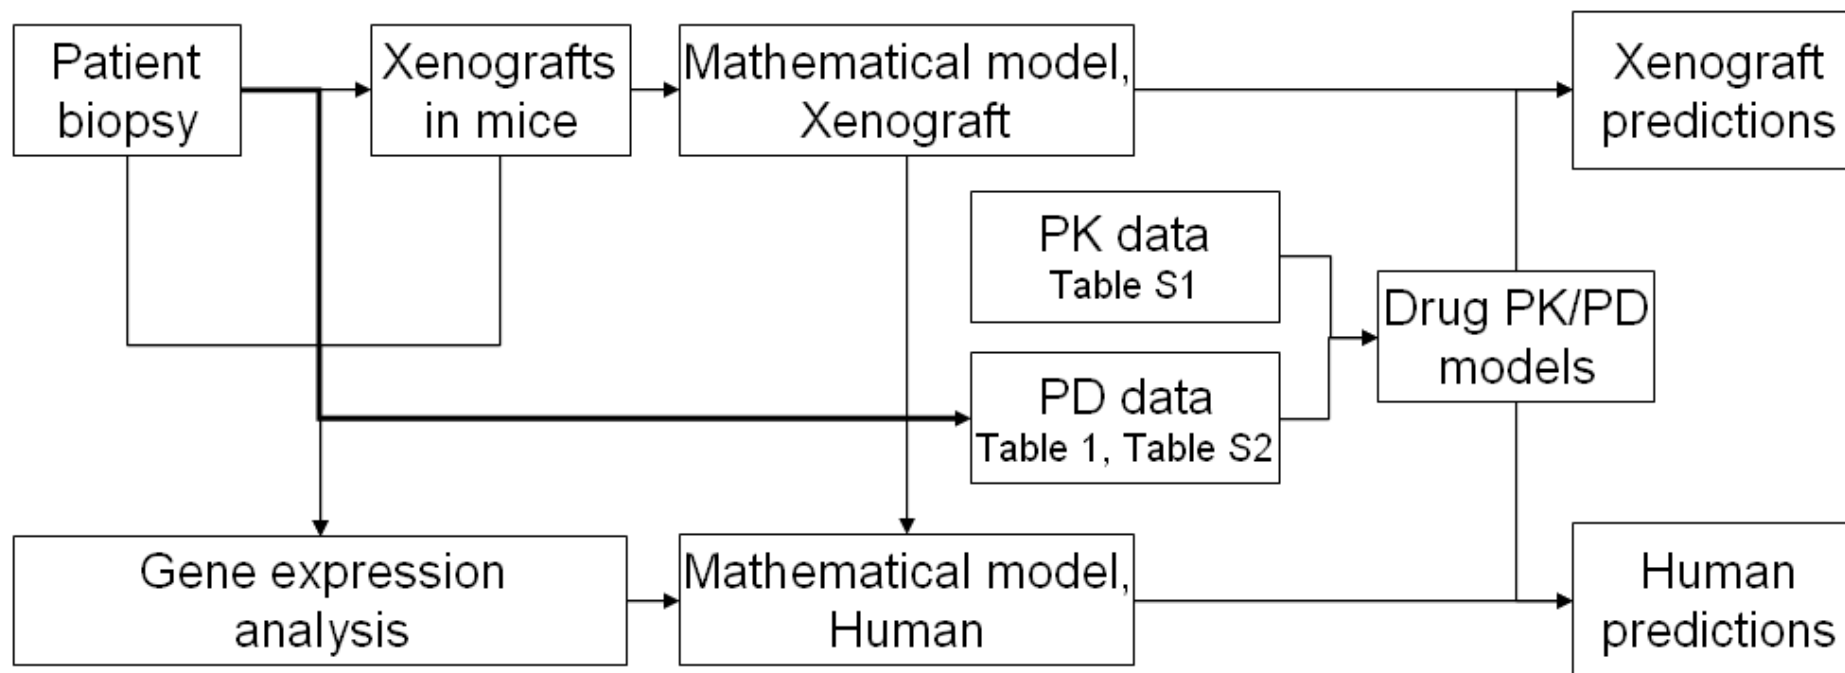

Figure S1 Schematic workflow of the study design

**Table S1 Sources for PK data. The numbers refer to the sources listed as "References" of this supplementary material**

| <u>Drug</u> | <u>Mice</u> | <u>Human</u> |
|-------------|-------------|--------------|
| Docetaxel   | S1          | S2,S3        |
| Doxorubicin | S4          | S5           |
| Gemcitabine | S6, S7, S8  | S9, S10      |
| Irinotecan  | S11         | S12          |
| Bevacizumab | S10         | S13          |
| Sorafenib   | S14         | S15          |

**Table S2 Sources for PD data. The numbers refer to the sources listed as "References" of this supplementary material**

| <u>Drug</u> | <u>Reference number</u> |
|-------------|-------------------------|
| Bevacizumab | S16, S17                |
| Sorafenib   | S18                     |

## References

- S1. Shimada T, Nomura M, Yokogawa K, et al. Pharmacokinetic advantage of intraperitoneal injection of docetaxel in the treatment for peritoneal dissemination of cancer in mice. *J Pharm Pharmacol*. 2005;57:177-181.
- S2. Van Zuylen L, Sparreboom A, van der GaA, et al. Disposition of Docetaxel in the presence of P-glycoprotein inhibition by intravenous administration of R101933. *Eur J Cancer*. 2002;38:1090-1099.
- S3. Extra JM, Rousseau F, Bruno R, Clavel M, Le Bail N, Marty M. Phase I and pharmacokinetic study of Taxotere (RP 56976; NSC 628503) given as a short intravenous infusion. *Cancer Res*. 1993;53:1037-1042.
- S4. Johansen PB. Doxorubicin pharmacokinetics after intravenous and intraperitoneal administration in the nude mouse. *Cancer Chemother Pharmacol*. 1981;5:267-270.
- S5. Gianni L, Vigano L, Locatelli A, et al. Human pharmacokinetic characterization and in vitro study of the interaction between doxorubicin and paclitaxel in patients with breast cancer. *J Clin Oncol*. 1997;15:1906-1915.
- S6. Shipley LA, Brown TJ, Cornpropst JD, Hamilton M, Daniels WD, Culp HW. Metabolism and disposition of gemcitabine, and oncolytic deoxycytidine analog, in mice, rats, and dogs. *Drug Metab Dispos*. 1992;20:849-855.
- S7. Wang H, Li M, Rinehart JJ, Zhang R. Pretreatment with dexamethasone increases antitumor activity of carboplatin and gemcitabine in mice bearing human cancer xenografts: in vivo activity, pharmacokinetics, and clinical implications for cancer chemotherapy. *Clin Cancer Res*. 2004;10:1633-1644.
- S8. van Moorsel CJ, Pinedo HM, Smid K, et al. Schedule-dependent pharmacodynamic effects of gemcitabine and cisplatin in mice bearing Lewis lung murine non-small cell lung tumours. *Eur J Cancer*. 2000;36:2420-2429.
- S9. Shamseddine AI, Khalifeh MJ, Mourad FH, et al. Comparative pharmacokinetics and metabolic pathway of gemcitabine during intravenous and intra-arterial delivery in unresectable pancreatic cancer patients. *Clin Pharmacokinet*. 2005;44:957-967.
- S10. Lin NM, Zeng S, Ma SL, Fan Y, Zhong HJ, Fang L. Determination of gemcitabine and its metabolite in human plasma using high-pressure liquid chromatography coupled with a diode array detector. *Acta Pharmacol Sin*. 2004;25:1584-1589.

- S11. Guichard S, Chatelut E, Lochon I, Bugat R, Mahjoubi M, Canal P. Comparison of the pharmacokinetics and efficacy of irinotecan after administration by the intravenous versus intraperitoneal route in mice. *Cancer Chemother Pharmacol.* 1998;42:165-170.
- S12. Masi G, Falcone A, Di Paolo A, et al. A phase I and pharmacokinetic study of irinotecan given as a 7-day continuous infusion in metastatic colorectal cancer patients pretreated with 5-fluorouracil or raltitrexed. *Clin Cancer Res.* 2004;10:1657-1663.
- S13. European Medicines Agency. Avastin, INN-bevacizumab. 2005.
- S14. Center for drug evaluation and research, FDA. Approval package for application number NDA 21-923. 2005.
- S15. Lathia C, Lettieri J, Cihon F, Gallentine M, Radtke M, Sundaresan P. Lack of effect of ketoconazole-mediated CYP3A inhibition on sorafenib clinical pharmacokinetics. *Cancer Chemother Pharmacol.* 2006;57:685-692.
- S16. Liang WC, Wu X, Peale FV, et al. Cross-species vascular endothelial growth factor (VEGF)-blocking antibodies completely inhibit the growth of human tumor xenografts and measure the contribution of stromal VEGF. *J Biol Chem.* 2006;281:951-961.
- S17. Mesiano S, Ferrara N, Jaffe RB. Role of vascular endothelial growth factor in ovarian cancer: inhibition of ascites formation by immunoneutralization. *Am J Pathol.* 1998;153:1249-1256.
- S18. Wilhelm SM, Carter C, Tang L, et al. BAY 43-9006 exhibits broad spectrum oral antitumor activity and targets the RAF/MEK/ERK pathway and receptor tyrosine kinases involved in tumor progression and angiogenesis. *Cancer Res.* 2004;64:7099-7109.
